# Supplementary material for: Plant Serpins: Potential Inhibitors of Serine and Cysteine Proteases with Multiple Functions
Source: MDPI journal article supplement (doi:10.3390/plants12203619), 2023-10-19
Supplement: s1 [file s1]

**Table S1.** Protocol established for conducting the systematic review, according to the PRISMA guidelines [42].

| <b>Protocol</b>                                                                                                                                                                                                                                                                                                                                                                                                                                                                                                                                                                                                                                                                                                    |                                                                                                                                                                                                                                                                                                                                                                                                                                                                           |
|--------------------------------------------------------------------------------------------------------------------------------------------------------------------------------------------------------------------------------------------------------------------------------------------------------------------------------------------------------------------------------------------------------------------------------------------------------------------------------------------------------------------------------------------------------------------------------------------------------------------------------------------------------------------------------------------------------------------|---------------------------------------------------------------------------------------------------------------------------------------------------------------------------------------------------------------------------------------------------------------------------------------------------------------------------------------------------------------------------------------------------------------------------------------------------------------------------|
| <b>Title</b>                                                                                                                                                                                                                                                                                                                                                                                                                                                                                                                                                                                                                                                                                                       |                                                                                                                                                                                                                                                                                                                                                                                                                                                                           |
| Plant serpins, potential inhibitors of serine and cysteine proteases with multiple functions                                                                                                                                                                                                                                                                                                                                                                                                                                                                                                                                                                                                                       |                                                                                                                                                                                                                                                                                                                                                                                                                                                                           |
| <b>Objectives</b>                                                                                                                                                                                                                                                                                                                                                                                                                                                                                                                                                                                                                                                                                                  |                                                                                                                                                                                                                                                                                                                                                                                                                                                                           |
| <ul style="list-style-type: none"> <li>- To broaden the knowledge about the serpin superfamily in plants, their identities and localization profiles;</li> <li>- To know which proteases are potentially inhibited by these inhibitors and if the serpins have other functions besides inhibitory potential.</li> </ul>                                                                                                                                                                                                                                                                                                                                                                                            |                                                                                                                                                                                                                                                                                                                                                                                                                                                                           |
| <b>Keywords: Database/ Search Strings</b>                                                                                                                                                                                                                                                                                                                                                                                                                                                                                                                                                                                                                                                                          |                                                                                                                                                                                                                                                                                                                                                                                                                                                                           |
| PubMed: (serpin*) AND plant*[Title/Abstract]                                                                                                                                                                                                                                                                                                                                                                                                                                                                                                                                                                                                                                                                       |                                                                                                                                                                                                                                                                                                                                                                                                                                                                           |
| Scopus: TITLE-ABS-KEY (serpin* AND plant*)                                                                                                                                                                                                                                                                                                                                                                                                                                                                                                                                                                                                                                                                         |                                                                                                                                                                                                                                                                                                                                                                                                                                                                           |
| Web of Science: TS=(serpin* AND plant*)                                                                                                                                                                                                                                                                                                                                                                                                                                                                                                                                                                                                                                                                            |                                                                                                                                                                                                                                                                                                                                                                                                                                                                           |
| <b>Questions</b>                                                                                                                                                                                                                                                                                                                                                                                                                                                                                                                                                                                                                                                                                                   |                                                                                                                                                                                                                                                                                                                                                                                                                                                                           |
| <ol style="list-style-type: none"> <li>1. In which countries has research with plant serpins been conducted?</li> <li>2. Among the serpins identified, which ones were characterized or presented more comprehensive studies, and in which species?</li> <li>3. In which plant parts have the serpins been identified?</li> <li>4. Are plant serpins serine or cysteine protease inhibitors? And against which proteases do serpins have inhibitory potential?</li> <li>5. Do serpins have other functions besides the inhibitory ones?</li> <li>6. Can serpins be related to defense events and plant stresses?</li> <li>7. Have the biological routes and functions of serpins been well established?</li> </ol> |                                                                                                                                                                                                                                                                                                                                                                                                                                                                           |
| <b>Study selection criteria</b>                                                                                                                                                                                                                                                                                                                                                                                                                                                                                                                                                                                                                                                                                    |                                                                                                                                                                                                                                                                                                                                                                                                                                                                           |
| <b>Inclusion</b>                                                                                                                                                                                                                                                                                                                                                                                                                                                                                                                                                                                                                                                                                                   | <b>Exclusion</b>                                                                                                                                                                                                                                                                                                                                                                                                                                                          |
| <ul style="list-style-type: none"> <li>- Research articles with experimental results only with plant serpins</li> <li>- Articles published in English</li> </ul>                                                                                                                                                                                                                                                                                                                                                                                                                                                                                                                                                   | <ul style="list-style-type: none"> <li>- Works such as dissertations and theses, books or book chapters, other reviews, protocols or reports, conference annals and short communications.</li> <li>- Non-English language article.</li> <li>- Inconclusive results or lack of validation demonstrated by figures, graphs, tables etc.</li> <li>- Articles that did not answer any of the questions in this review.</li> <li>- Non-serpin inhibitors in plants.</li> </ul> |
