# Supplementary material for: Plant Serpins: Potential Inhibitors of Serine and Cysteine Proteases with Multiple Functions
Source: MDPI journal article supplement (doi:10.3390/plants12203619), 2023-10-19
Supplement: s1 [file s1]

**Table S3.** Distribution of serpins in different parts of the plant.

| Serpins**                                                                                                                  | Localization                                                                                           | Author |
|----------------------------------------------------------------------------------------------------------------------------|--------------------------------------------------------------------------------------------------------|--------|
|                                                                                                                            | <i>Hordeum vulgare</i>                                                                                 |        |
|                                                                                                                            |                                                                                                        | [48]   |
|                                                                                                                            |                                                                                                        | [79]*  |
|                                                                                                                            |                                                                                                        | [87]*  |
|                                                                                                                            |                                                                                                        | [30]*  |
|                                                                                                                            | Seeds/Grains                                                                                           | [99]*  |
|                                                                                                                            |                                                                                                        | [31]*  |
| BSZ7 (Serpin-Z7)<br>(Q43492.2)                                                                                             |                                                                                                        | [111]* |
|                                                                                                                            |                                                                                                        | [113]* |
|                                                                                                                            |                                                                                                        | [122]* |
|                                                                                                                            |                                                                                                        | [121]* |
|                                                                                                                            | Seeds/Grains, embryos, embryo-derived callus, coleoptiles, shoots, roots                               | [61]   |
|                                                                                                                            | Seeds/Grains, beer                                                                                     | [38]   |
|                                                                                                                            | Beer                                                                                                   | [89]*  |
|                                                                                                                            |                                                                                                        | [103]* |
|                                                                                                                            |                                                                                                        | [73]   |
|                                                                                                                            |                                                                                                        | [77]*  |
|                                                                                                                            | Seeds/Grains                                                                                           | [79]*  |
|                                                                                                                            |                                                                                                        | [90]*  |
|                                                                                                                            |                                                                                                        | [30]*  |
|                                                                                                                            |                                                                                                        | [111]* |
|                                                                                                                            |                                                                                                        | [121]* |
| BSZ4 (Serpin-Z4)<br>(P06293.2)                                                                                             | Seeds/Grains, embryos, embryo-derived callus, roots, coleoptiles, leaves, shoots and senescing leaves, | [61]   |
|                                                                                                                            | Seeds/Grains, beer                                                                                     | [38]   |
|                                                                                                                            | Seeds/Grains, cytosol of transformed tobacco leaves                                                    | [22]   |
|                                                                                                                            |                                                                                                        | [89]*  |
|                                                                                                                            | Beer                                                                                                   | [39]*  |
|                                                                                                                            |                                                                                                        | [103]* |
|                                                                                                                            | Barley heads                                                                                           | [88]   |
|                                                                                                                            |                                                                                                        | [83]*  |
|                                                                                                                            |                                                                                                        | [91]*  |
| Z-type serpin<br>(CAA66232.1)                                                                                              | Seeds/Grains                                                                                           | [90]*  |
|                                                                                                                            |                                                                                                        | [99]*  |
|                                                                                                                            |                                                                                                        | [113]* |
|                                                                                                                            | Seeds/Grains, beer                                                                                     | [74]   |
|                                                                                                                            |                                                                                                        | [81]*  |
|                                                                                                                            |                                                                                                        | [79]*  |
|                                                                                                                            | Seeds/Grains                                                                                           | [87]*  |
| BSZx (Serpin-Zx)<br>(Q40066.1)                                                                                             |                                                                                                        | [121]* |
|                                                                                                                            |                                                                                                        | [122]* |
|                                                                                                                            | Seeds/Grains, embryos, embryo-derived callus, roots, coleoptiles, shoots, leaf                         | [61]   |
|                                                                                                                            | Beer                                                                                                   | [89]*  |
| SPZ5: Putative serpin-Z5<br>from <i>Oryza sativa</i><br>(Q53MD3)                                                           | Barley shoots (first leaves)                                                                           | [96]*  |
| Serpin (TC No.151425)<br>vSRP3-2<br>(HORVU3Hr1G074320)<br>HvSRP4-1<br>(HORVU4Hr1G013480)<br>HvSRP5-1<br>(HORVU5Hr1G101710) | Leaf                                                                                                   | [84]*  |
|                                                                                                                            | Grain (caryopsis)                                                                                      | [123]  |

|                                  |                                                |             |
|----------------------------------|------------------------------------------------|-------------|
| HvSRP5-2<br>(HORVU5Hr1G111860)   |                                                |             |
| HvSRP5-3<br>(HORVU5Hr1G111920)   |                                                |             |
| HvSRP6-1<br>(HORVU6Hr1G008650)   |                                                |             |
| HvSRP6-2<br>(HORVU6Hr1G008840)   |                                                |             |
| HvSRP1-1<br>(HORVU1Hr1G071460)   | Root seedling, shoot seedling, internodal area |             |
| HvSRP7-1<br>(HORVU7Hr1G008620)   | Root seedling and internodes, embryo           |             |
| HvSRP4-3<br>(HORVU4Hr1G013550)   |                                                |             |
| HvSRP4-7<br>(HORVU4Hr1G079160)   | Germinating embryo                             |             |
| HvSRP6-3<br>(HORVU6Hr1G008860)   |                                                |             |
| HvSRP4-6<br>(HORVU4Hr1G064290)   | Caryopsis, embryo                              |             |
| <i>Triticum aestivum</i> L.      |                                                |             |
| WSZ1a (Serpín-Z1A)<br>(Q41593.1) | Seeds/Grains                                   | [16]        |
|                                  |                                                | [80]*       |
|                                  |                                                | [94]*       |
|                                  |                                                | [114]*      |
|                                  |                                                | [117]*      |
|                                  |                                                | [85]*       |
|                                  |                                                | [59]*       |
| WSZ1b (Serpín-Z1B)<br>(P93693)   | Seeds/Grains, ovary, rachis, spike             | [104]*      |
|                                  |                                                | [119]*      |
|                                  |                                                | [28]*       |
|                                  |                                                | [120]       |
|                                  |                                                | wheat flour |
|                                  |                                                | [57]*       |
|                                  |                                                | Beer        |
| WSZ1c (Serpín-Z1C)<br>(Q9ST58)   | Seeds/Grains                                   | [103]*      |
|                                  |                                                | [16]        |
|                                  |                                                | [80]*       |
|                                  |                                                | [92]*       |
|                                  |                                                | [114]*      |
|                                  |                                                | [119]*      |
|                                  |                                                | [120]       |
| WSZ2a (Serpín-Z2A)<br>(Q9ST57)   | Seeds/Grains                                   | [54]*       |
|                                  |                                                | [102]*      |
|                                  |                                                | [104]*      |
|                                  |                                                | [119]*      |
|                                  |                                                | [28]*       |
|                                  |                                                | [120]       |
|                                  |                                                | wheat flour |
| WSZ2b (Serpín-Z2B)<br>(Q9ST59)   | Seeds/Grains, ovary, rachis, spike             | [57]*       |
|                                  |                                                | [103]*      |
|                                  |                                                | [16]        |
|                                  |                                                | [80]*       |
|                                  |                                                | [92]*       |
|                                  |                                                | [102]*      |
|                                  |                                                | [104]*      |
| WSZ2c (Serpín-Z2C)<br>(Q9ST60)   | Seeds/Grains                                   | [119]*      |
|                                  |                                                | [28]*       |
|                                  |                                                | [120]       |
|                                  |                                                | wheat flour |
|                                  |                                                | [54]*       |
|                                  |                                                | [102]*      |
|                                  |                                                | [104]*      |
| WSZ2d (Serpín-Z2D)<br>(Q9ST61)   | Seeds/Grains                                   | [117]*      |
|                                  |                                                | [85]*       |
|                                  |                                                | [59]*       |
|                                  |                                                | [104]*      |
|                                  |                                                | [119]*      |
|                                  |                                                | [28]*       |
|                                  |                                                | [120]       |

|                                                      |                                                                                       |        |
|------------------------------------------------------|---------------------------------------------------------------------------------------|--------|
|                                                      | Seeds/Grains, ovary, rachis, spike                                                    | [120]  |
|                                                      | Beer                                                                                  | [103]* |
|                                                      | Leaves                                                                                | [125]* |
| WSZ2b (Serpín-Z2B)<br>(P93692)                       |                                                                                       | [16]   |
|                                                      |                                                                                       | [80]*  |
|                                                      |                                                                                       | [85]*  |
|                                                      |                                                                                       | [94]*  |
|                                                      | Seeds/Grains                                                                          | [92]*  |
|                                                      |                                                                                       | [104]* |
|                                                      |                                                                                       | [108]* |
|                                                      |                                                                                       | [110]* |
|                                                      |                                                                                       | [114]* |
|                                                      |                                                                                       | [28]*  |
|                                                      | Seeds/Grains, ovary, rachis, spike                                                    | [120]  |
|                                                      | Wheat bran                                                                            | [101]* |
| WSZ2c                                                | Wheat flour                                                                           | [54]*  |
|                                                      |                                                                                       | [57]*  |
|                                                      | Beer                                                                                  | [103]* |
|                                                      | Leaves                                                                                | [125]* |
|                                                      | Seeds/Grains, ovary, rachis, spike                                                    | [120]  |
| TraesCS3B01G335800                                   |                                                                                       |        |
| TraesCS4A01G422200                                   |                                                                                       |        |
| TraesCS4B01G079100                                   |                                                                                       |        |
| TraesCS6D01G048700                                   | Seeds/Grains                                                                          |        |
| TraesCS3D01G301100                                   |                                                                                       |        |
| TraesCS6D01G114700                                   |                                                                                       |        |
| TraesCS2B01G530600                                   |                                                                                       |        |
| TraesCS4B01G079200                                   |                                                                                       | [120]  |
| TraesCS4A01G235700                                   | Seeds/Grains, spike, rachis, ovary                                                    |        |
| TraesCS4A01G436000                                   |                                                                                       |        |
| TraesCS4A01G205200                                   | Seeds/Grains, spike                                                                   |        |
| TraesCS4D01G231200                                   |                                                                                       |        |
| TraesCS6B01G068900                                   |                                                                                       |        |
| TraesCS4D01G106100                                   | Seeds/Grains, spike, ovary                                                            |        |
| Serpín 1 (Serpín Bu-1)<br>(C0LF30)                   |                                                                                       | [92]*  |
|                                                      |                                                                                       | [114]* |
|                                                      | Seeds/Grains                                                                          | [117]* |
|                                                      |                                                                                       | [110]* |
|                                                      |                                                                                       | [104]* |
|                                                      | Leaves, roots                                                                         | [106]  |
|                                                      | Plants (it was not reported which part of the plant was used for feeding the insects) | [112]* |
| Serpín 2<br>(C0LF31)                                 | Seeds/Grains                                                                          | [100]* |
|                                                      |                                                                                       | [110]* |
|                                                      | Leaves, roots                                                                         | [106]  |
| Serpín 3<br>(C0LF32)                                 | Seeds/Grains                                                                          | [100]* |
|                                                      | wheat flour                                                                           | [57]*  |
| Serpín-N3.2<br>(H9AXB3)                              |                                                                                       | [100]* |
|                                                      | Seeds/Grains                                                                          | [110]* |
| Serpín Bu-4                                          |                                                                                       | [92]*  |
| <i>Srp5B</i>                                         | Seeds/Grains                                                                          | [98]*  |
| Serpín (unreported identity)                         | Seeds/Grains                                                                          | [109]* |
| Serpín<br>(A0A3B6TLW2)                               | Seeds/Grains                                                                          | [119]* |
|                                                      |                                                                                       | [28]*  |
| SERPIN domain-<br>containing protein<br>(A0A3B6MWJ8) |                                                                                       | [119]* |
|                                                      | Seeds/Grains                                                                          | [28]*  |

|                                |                                                       |        |
|--------------------------------|-------------------------------------------------------|--------|
| A0A3B6DK48                     |                                                       |        |
| A0A3B6HVL4                     |                                                       |        |
| A0A3B6IPZ0                     |                                                       |        |
| A0A3B6JDS9                     |                                                       |        |
| A0A3B6KQC8                     | Seeds/Grains                                          | [28]*  |
| A0A3B6KQL2                     |                                                       |        |
| A0A3B6KR02                     |                                                       |        |
| A0A3B6KSZ6                     |                                                       |        |
| A0A3B6SDG4                     |                                                       |        |
| A0A3B6SF67                     |                                                       |        |
| <i>Secale cereale</i>          |                                                       |        |
| RSZ (a, b, c1, c2, d, e, f)    | Seeds/Grains                                          | [49]   |
| <i>Avena sativa</i> L.         |                                                       |        |
| OSZ (a, b, c, d)               | Seeds/Grains                                          | [50]   |
| <i>Oryza sativa</i>            |                                                       |        |
| <i>OsSRP-LRS</i>               | Seeds/Grains, callus, seedling, roots, stems, leaves  | [95]   |
| (Os03g41419)                   | Leaf sheath, leaves                                   | [19]   |
| <i>OsSRP-PLP</i>               |                                                       |        |
| (Os11g11500)                   |                                                       |        |
| <i>OsSRP-LGC</i>               |                                                       |        |
| (Os01g56010)                   |                                                       |        |
| <i>OsSRP-FLC</i>               | Seeds/Grains, callus, seedling, roots, stems, leaves  |        |
| (Os11g13540)                   |                                                       |        |
| <i>OsSRP-FRS</i>               |                                                       | [95]   |
| (Os03g41438)                   |                                                       |        |
| <i>OsSRP-QKG</i>               |                                                       |        |
| (Os01g16200)                   |                                                       |        |
| <i>OsSRP-FAZ</i>               | Seeds/Grains, callus                                  |        |
| (Os11g12460)                   |                                                       |        |
| <i>OsSRP-PTY</i>               | Seeds/Grains, seedling, roots, stems                  |        |
| (Os04g45110)                   |                                                       |        |
| <i>OsSRP-ZXA</i>               | Leaves                                                | [126]* |
| (Q75H81)                       |                                                       |        |
| <i>Avena fatua</i> L.          |                                                       |        |
| Protein Z (Z1)                 | Seeds/Grains                                          | [75]   |
| <i>Brachypodium distachyon</i> |                                                       |        |
| BdSRP2-1                       |                                                       |        |
| (Bradi2g50900)                 |                                                       |        |
| BdSRP4-10                      |                                                       |        |
| (Bradi4g23062)                 | Seeds, anther                                         |        |
| BdSRP4-11                      |                                                       |        |
| (Bradi4g23070)                 |                                                       |        |
| BdSRP4-16                      |                                                       |        |
| (Bradi4g24570)                 |                                                       |        |
| BdSRP4-1                       |                                                       |        |
| (Bradi4g14070)                 | Anther                                                | [123]  |
| BdSRP4-5                       |                                                       |        |
| (Bradi4g15390)                 |                                                       |        |
| BdSRP1-3                       |                                                       |        |
| (Bradi1g14740)                 | Embryo                                                |        |
| BdSRP4-7                       |                                                       |        |
| (Bradi4g22020)                 |                                                       |        |
| BdSRP5-5                       | Endosperm, pistil, seed                               |        |
| (Bradi5g16780)                 |                                                       |        |
| BdSRP1-2                       | Seed, pistil and embryo                               |        |
| (Bradi1g14730)                 |                                                       |        |
| AtSerp1                        | Root tip, subcellular localization in apoplast        | [43]   |
| (Q9S7T8)                       | Silique, flowers, stem, leaf, roots, seedlings        | [86]   |
|                                | Flowers, siliques, stem, leaf, root                   | [44]   |
|                                | Seedling, leaf, subcellular localization in cytoplasm | [17]   |

|                                              |                                                                                                                                                                       |        |
|----------------------------------------------|-----------------------------------------------------------------------------------------------------------------------------------------------------------------------|--------|
|                                              | Leaf                                                                                                                                                                  | [45]   |
|                                              | Seedling, hypocotyl, root, cotyledons, first leaves, hypocotyl (in <i>Arabidopsis</i> ) and subcellular localization in leaf epidermis of <i>N. benthamiana</i>       | [107]  |
|                                              | Seedlings, cotyledons of greening seedlings                                                                                                                           | [46]   |
|                                              | Root                                                                                                                                                                  | [116]  |
|                                              | Leaves (rosette leaves), and subcellular localization in cytoplasm and nucleo of epidermal <i>N. benthamiana</i> cells by Agrobacterium-mediated transient expression | [18]   |
| <i>AtSRP2 (At2g14540)</i>                    | Siliques, Flowers, subcellular localization in nucleus                                                                                                                | [86]   |
| <i>AtSRP3 (At1g64030)</i>                    | Siliques, flowers, subcellular localization in cytosol                                                                                                                |        |
| <i>AtSRP4 (At2g26390)</i>                    | Siliques, flowers, stem, leaves, roots, seedlings                                                                                                                     | [86]   |
|                                              | Leaves                                                                                                                                                                | [37]   |
| <i>AtSRP5 (At2g25240)</i>                    | Leaves                                                                                                                                                                |        |
| <i>Cucurbita máxima</i>                      |                                                                                                                                                                       |        |
|                                              | Stem (phloem exudate)                                                                                                                                                 | [51]   |
| CmPS-1<br>(AAG02411.1)                       | Phloem (phloem exudate after germination): root–shoot transition region                                                                                               | [82]   |
|                                              | Phloem exudates, subcellular localization in <i>N. benthamiana</i> leaf epidermal cells                                                                               | [23]   |
| <i>Cucumis sativus</i>                       |                                                                                                                                                                       |        |
| CsPS-1                                       | Phloem (phloem exudate after germination): root–shoot transition region                                                                                               | [82]   |
| <i>Malus domestica</i> Borkh.                |                                                                                                                                                                       |        |
| MdZ1a                                        | Young fruit, buds, expanding leaves, vascular tissues                                                                                                                 | [52]   |
| MdZ1b                                        | Vegetative buds, cotyledons, seeds                                                                                                                                    |        |
| MdZ1c                                        | Expanding leaves                                                                                                                                                      |        |
| MdZ2a                                        | Fruit, buds, seeds, leaves, vascular tissues                                                                                                                          |        |
| <i>Medicago truncatula</i>                   |                                                                                                                                                                       |        |
| <i>MtPi4</i>                                 | Seed, root, leaf, stem and flower tissues                                                                                                                             | [65]   |
| <i>MtSer (5, 6, 8, 9, 10)</i>                | Nodules (root)                                                                                                                                                        | [20]   |
| <i>Centaurea maculosa</i> (Spotted knapweed) |                                                                                                                                                                       |        |
| CmSER-1                                      | Leave                                                                                                                                                                 | [76]   |
| <i>Citrus paradisi</i> Macf. Cv. Marsh       |                                                                                                                                                                       |        |
| <i>serpL-1</i>                               | Grapefruit flavedo, Young immature and mature leaves                                                                                                                  | [78]   |
| <i>Citrullus vulgaris</i>                    |                                                                                                                                                                       |        |
| Serpin (no identification code)              | Seeds                                                                                                                                                                 | [93]   |
| <i>Pyrus communis</i>                        |                                                                                                                                                                       |        |
| Serpin-like protein (JK086945)               | Leaves                                                                                                                                                                | [105]  |
| JK086934                                     |                                                                                                                                                                       |        |
| <i>Solanum lycopersicum</i>                  |                                                                                                                                                                       |        |
| Solyc04g079480.2                             | Abscission zone tissues after flower removal (R)                                                                                                                      | [115]  |
| <i>Glycine max</i>                           |                                                                                                                                                                       |        |
| Serpin-ZX: XP_003528230.1                    | Seeds                                                                                                                                                                 | [124]  |
| Serpin-ZX: XP_003523896.1                    |                                                                                                                                                                       |        |
| <i>Agapanthus praecox</i>                    |                                                                                                                                                                       |        |
| ApSerpin-ZX                                  | Embryogenic callus                                                                                                                                                    | [53]   |
| <i>Physcomitrella patens</i>                 |                                                                                                                                                                       |        |
| Pp1s22_263V6.1                               | Moss                                                                                                                                                                  | [118]* |
| Pp1s414_23V6.1                               |                                                                                                                                                                       |        |
| Pp1s61_265V6.1                               |                                                                                                                                                                       |        |
| Pp1s86_63V6.1                                |                                                                                                                                                                       |        |

\*Refers to articles in which proteins were identified by proteomic analysis.

\*\* Only serpins located by different experimental analyses or extracted from different tissues were counted. Recombinant serpins were not considered.
