# Supplementary material for: Plant Serpins: Potential Inhibitors of Serine and Cysteine Proteases with Multiple Functions
Source: MDPI journal article supplement (doi:10.3390/plants12203619), 2023-10-19
Supplement: s1 [file s1]

**Table S2.** Articles selected for the Systematic Review.

| Title                                                                                                                                                                                              | Authors | DOI                                                                                                                 |
|----------------------------------------------------------------------------------------------------------------------------------------------------------------------------------------------------|---------|---------------------------------------------------------------------------------------------------------------------|
| A 39 kd barley seed protein of the serpin superfamily inhibits $\alpha$ -chymotrypsin                                                                                                              | [48]    | <a href="https://doi.org/10.1007/BF02904471">https://doi.org/10.1007/BF02904471</a>                                 |
| A plant serpin gene. Structure, organization and expression of the gene encoding barley protein Z4                                                                                                 | [73]    | <a href="https://doi.org/10.1111/j.1432-1033.1990.tb15644.x">https://doi.org/10.1111/j.1432-1033.1990.tb15644.x</a> |
| Major proteins of beer and their precursors in barley: Electrophoretic and immunological studies                                                                                                   | [74]    | <a href="https://doi.org/10.1021/jf00058a013">https://doi.org/10.1021/jf00058a013</a>                               |
| Inhibition of coagulation factors by recombinant barley serpin BSZx                                                                                                                                | [15]    | <a href="https://doi.org/10.1016/0014-5793(96)00940-4">https://doi.org/10.1016/0014-5793(96)00940-4</a>             |
| Heterologous expression of three plant serpins with distinct inhibitory specificities                                                                                                              | [14]    | <a href="https://doi.org/10.1074/jbc.271.41.25083">https://doi.org/10.1074/jbc.271.41.25083</a>                     |
| Inhibitory serpins from wheat grain with reactive centers resembling glutamine-rich repeats of prolamin storage proteins. Cloning and characterization of five major molecular forms               | [16]    | <a href="https://doi.org/10.1074/jbc.M004633200">https://doi.org/10.1074/jbc.M004633200</a>                         |
| Degradation of endosperm mRNAs during dry after ripening of cereal grains                                                                                                                          | [75]    | <a href="https://doi.org/10.1017/S096025850000026X">https://doi.org/10.1017/S096025850000026X</a>                   |
| Characterization of <i>Cucurbita maxima</i> phloem serpin-1 (CmPS-1). A developmentally regulated elastase inhibitor                                                                               | [51]    | <a href="https://doi.org/10.1074/jbc.M006060200">https://doi.org/10.1074/jbc.M006060200</a>                         |
| Inhibitory serpins from rye grain with glutamine as P1 and P2 residues in the reactive center                                                                                                      | [49]    | <a href="https://doi.org/10.1016/S0014-5793(00)02425-X">https://doi.org/10.1016/S0014-5793(00)02425-X</a>           |
| Serpins of oat ( <i>Avena sativa</i> ) grain with distinct reactive centers and inhibitory specificity                                                                                             | [50]    | <a href="https://doi.org/10.1034/j.1399-3054.2002.1160204.x">https://doi.org/10.1034/j.1399-3054.2002.1160204.x</a> |
| Differential gene expression for suicide-substrate serine proteinase inhibitors (serpins) in vegetative and grain tissues of barley                                                                | [61]    | <a href="https://doi.org/10.1093/jxb/erg248">https://doi.org/10.1093/jxb/erg248</a>                                 |
| Altered gene expression in three plant species in response to treatment with Nep1, a fungal protein that causes necrosis                                                                           | [76]    | <a href="https://doi.org/10.1104/pp.102.019836">https://doi.org/10.1104/pp.102.019836</a>                           |
| The barley starch granule proteome - Internalized granule polypeptides of the mature endosperm                                                                                                     | [77]    | <a href="https://doi.org/10.1016/j.plantsci.2003.10.028">https://doi.org/10.1016/j.plantsci.2003.10.028</a>         |
| Putative protease inhibitor gene discovery and transcript profiling during fruit development and leaf damage in grapefruit ( <i>Citrus paradisi</i> Macf.)                                         | [78]    | <a href="https://doi.org/10.1016/j.gene.2003.10.010">https://doi.org/10.1016/j.gene.2003.10.010</a>                 |
| Proteome analysis of barley seeds: Identification of major proteins from two-dimensional gels (p/ 4-7)                                                                                             | [79]    | <a href="https://doi.org/10.1002/pmic.200300753">https://doi.org/10.1002/pmic.200300753</a>                         |
| The identification of foam-forming soluble proteins from wheat ( <i>Triticum aestivum</i> ) dough                                                                                                  | [80]    | <a href="https://doi.org/10.1002/pmic.200401035">https://doi.org/10.1002/pmic.200401035</a>                         |
| Serpins in fruit and vegetative tissues of apple ( <i>Malus domestica</i> ): Expression of four serpins with distinct reactive centres and characterisation of a major inhibitory seed form, MdZ1b | [52]    | <a href="https://doi.org/10.1071/FP04220">https://doi.org/10.1071/FP04220</a>                                       |
| Probing heat-stable water-soluble proteins from barley to malt and beer                                                                                                                            | [81]    | <a href="https://doi.org/10.1002/pmic.200401153">https://doi.org/10.1002/pmic.200401153</a>                         |
| <i>Cucurbit</i> phloem serpins are graft-transmissible and appear to be resistant to turnover in the sieve element-companion cell complex                                                          | [82]    | <a href="https://doi.org/10.1093/jxb/eri308">https://doi.org/10.1093/jxb/eri308</a>                                 |
| Serpin1 of <i>Arabidopsis thaliana</i> is a Suicide Inhibitor for Metacaspase 9                                                                                                                    | [43]    | <a href="https://doi.org/10.1016/j.jmb.2006.09.010">https://doi.org/10.1016/j.jmb.2006.09.010</a>                   |
| Is quantity of protein in barley forms determined by proteins localized in the subaleurone layer?                                                                                                  | [83]    | <a href="https://doi.org/10.1007/BF02706623">https://doi.org/10.1007/BF02706623</a>                                 |
| Proteomic analysis of wheat flour allergens                                                                                                                                                        | [54]    | <a href="https://doi.org/10.1021/jf070843a">https://doi.org/10.1021/jf070843a</a>                                   |
| A comprehensive analysis of the 14-3-3 interactome in barley leaves using a complementary proteomics and two-hybrid approach                                                                       | [84]    | <a href="https://doi.org/10.1104/pp.106.090159">https://doi.org/10.1104/pp.106.090159</a>                           |

|                                                                                                                                                                                            |       |                                                                                                                 |
|--------------------------------------------------------------------------------------------------------------------------------------------------------------------------------------------|-------|-----------------------------------------------------------------------------------------------------------------|
| Proteomic analysis of wheat proteins recognized by IgE antibodies of allergic patients                                                                                                     | [55]  | <a href="https://doi.org/10.1002/pmic.200700347">https://doi.org/10.1002/pmic.200700347</a>                     |
| Effect of environmental stress during grain filling on the soluble proteome of wheat ( <i>Triticum aestivum</i> ) dough liquor                                                             | [85]  | <a href="https://doi.org/10.1021/jf800209b">https://doi.org/10.1021/jf800209b</a>                               |
| Serpin genes <i>AtSRP2</i> and <i>AtSRP3</i> are required for normal growth sensitivity to a DNA alkylating agent in <i>Arabidopsis</i>                                                    | [86]  | <a href="https://doi.org/10.1186/1471-2229-9-52">https://doi.org/10.1186/1471-2229-9-52</a>                     |
| Integration of the barley genetic and seed proteome maps for chromosome 1H, 2H, 3H, 5H and 7H                                                                                              | [87]  | <a href="https://doi.org/10.1007/s10142-008-0101-z">https://doi.org/10.1007/s10142-008-0101-z</a>               |
| Lipid transfer proteins and protease inhibitors as key factors in the priming of barley responses to Fusarium head blight disease by a biocontrol strain of <i>Pseudomonas fluorescens</i> | [88]  | <a href="https://doi.org/10.1007/s10142-010-0177-0">https://doi.org/10.1007/s10142-010-0177-0</a>               |
| Les Maîtres de l'Orge: The Proteome Content of Your Beer Mug                                                                                                                               | [89]  | <a href="https://doi.org/10.1021/pr100551n">https://doi.org/10.1021/pr100551n</a>                               |
| <i>Arabidopsis</i> AtSerpin1, crystal structure and in vivo interaction with its target protease RESPONSIVE to DESICCATION-21 (RD21)                                                       | [44]  | <a href="https://doi.org/10.1074/jbc.M109.095075">https://doi.org/10.1074/jbc.M109.095075</a>                   |
| Proteome analysis of Fusarium head blight in grains of naked barley ( <i>Hordeum vulgare</i> subsp. nudum)                                                                                 | [90]  | <a href="https://doi.org/10.1002/pmic.201000322">https://doi.org/10.1002/pmic.201000322</a>                     |
| Potential use of a serpin from <i>Arabidopsis</i> for pest control                                                                                                                         | [29]  | <a href="https://doi.org/10.1371/journal.pone.0020278">https://doi.org/10.1371/journal.pone.0020278</a>         |
| Multiple wheat flour allergens and cross-reactive carbohydrate determinants bind IgE in baker's asthma                                                                                     | [56]  | <a href="https://doi.org/10.1111/j.1398-9995.2011.02636.x">https://doi.org/10.1111/j.1398-9995.2011.02636.x</a> |
| Mapping of quantitative trait loci associated with protein expression variation in barley grains                                                                                           | [91]  | <a href="https://doi.org/10.1007/s11032-010-9432-2">https://doi.org/10.1007/s11032-010-9432-2</a>               |
| Differential effects of a post-anthesis fertilizer regimen on the wheat flour proteome determined by quantitative 2-DE                                                                     | [92]  | <a href="https://doi.org/10.1186/1477-5956-9-46">https://doi.org/10.1186/1477-5956-9-46</a>                     |
| Development of DNA markers associated with beer foam stability for barley breeding                                                                                                         | [38]  | <a href="https://doi.org/10.1007/s00122-010-1436-0">https://doi.org/10.1007/s00122-010-1436-0</a>               |
| Bioactive compounds obtained by immobilisation of serine protease inhibitors                                                                                                               | [93]  | <a href="https://doi.org/10.1504/IJNBM.2011.045884">https://doi.org/10.1504/IJNBM.2011.045884</a>               |
| Analyses of albumins, globulins and amphiphilic proteins by proteomic approach give new insights on waxy wheat starch metabolism                                                           | [94]  | <a href="https://doi.org/10.1016/j.jcs.2010.11.001">https://doi.org/10.1016/j.jcs.2010.11.001</a>               |
| Serpins in rice: Protein sequence analysis, phylogeny and gene expression during development                                                                                               | [95]  | <a href="https://doi.org/10.1186/1471-2164-13-449">https://doi.org/10.1186/1471-2164-13-449</a>                 |
| Proteome analysis of gut and salivary gland proteins of fifth-instar nymph and adults of the sunn pest, <i>Eurygaster integriceps</i>                                                      | [59]  | <a href="https://doi.org/10.1002/arch.21047">https://doi.org/10.1002/arch.21047</a>                             |
| Phosphatase activity in barley proteins tightly bound to DNA and its development-dependent changes                                                                                         | [96]  | <a href="https://doi.org/10.1134/S0006297912060168">https://doi.org/10.1134/S0006297912060168</a>               |
| Molecular and immunological characterization of wheat Serpin (Tri a 33)                                                                                                                    | [97]  | <a href="https://doi.org/10.1002/mnfr.201200244">https://doi.org/10.1002/mnfr.201200244</a>                     |
| Distribution of alleles of grain quality genes in Indian bread wheat varieties                                                                                                             | [98]  | No DOI                                                                                                          |
| Set-point control of RD21 protease activity by AtSerpin1 controls cell death in <i>Arabidopsis</i>                                                                                         | [17]  | <a href="https://doi.org/10.1111/tpj.12141">https://doi.org/10.1111/tpj.12141</a>                               |
| Proteomic analysis of differences in barley ( <i>Hordeum vulgare</i> ) malts with distinct filterability by DIGE                                                                           | [30]  | <a href="http://dx.doi.org/10.1016/j.jprot.2013.05.038">http://dx.doi.org/10.1016/j.jprot.2013.05.038</a>       |
| Differences in grain ultrastructure, phytochemical and proteomic profiles between the two contrasting grain Cd-accumulation barley genotypes                                               | [99]  | <a href="https://doi.org/10.1371/journal.pone.0079158">https://doi.org/10.1371/journal.pone.0079158</a>         |
| iTRAQ-based quantitative proteome and phosphoprotein characterization reveals the central metabolism changes involved in wheat grain development                                           | [100] | <a href="https://doi.org/10.1186/1471-2164-15-1029">https://doi.org/10.1186/1471-2164-15-1029</a>               |
| Characterization of barley serpin Z7 that plays multiple roles in malt and beer                                                                                                            | [31]  | <a href="https://doi.org/10.1021/jf405699z">https://doi.org/10.1021/jf405699z</a>                               |

|                                                                                                                                                                                  |       |                                                                                                             |
|----------------------------------------------------------------------------------------------------------------------------------------------------------------------------------|-------|-------------------------------------------------------------------------------------------------------------|
| A proteinaceous fraction of wheat bran may interfere in the attachment of enterotoxigenic <i>E. coli</i> K88 (F4+) to porcine epithelial cells                                   | [101] | <a href="https://doi.org/10.1371/journal.pone.0104258">https://doi.org/10.1371/journal.pone.0104258</a> .   |
| Specific nongluten proteins of wheat are novel target antigens in celiac disease humoral response                                                                                | [57]  | <a href="https://doi.org/10.1021/pr500809b">https://doi.org/10.1021/pr500809b</a>                           |
| Rising CO <sub>2</sub> concentration altered wheat grain proteome and flour rheological characteristics                                                                          | [102] | <a href="https://doi.org/10.1016/j.foodchem.2014.07.044">https://doi.org/10.1016/j.foodchem.2014.07.044</a> |
| Proteomics, peptidomics, and immunogenic potential of wheat beer (weissbier)                                                                                                     | [103] | <a href="https://doi.org/10.1021/acs.jafc.5b00631">https://doi.org/10.1021/acs.jafc.5b00631</a>             |
| Proteomic analysis reveals key proteins and phosphoproteins upon seed germination of wheat ( <i>Triticum aestivum</i> L.)                                                        | [104] | <a href="https://doi.org/10.3389/fpls.2015.01017">https://doi.org/10.3389/fpls.2015.01017</a>               |
| Mechanisms of resistance/tolerance of <i>Pyrus communis</i> to <i>Stemphylium vesicarium</i> . A transcriptome analysis                                                          | [105] | <a href="https://doi.org/10.1007/s10457-015-9831-9">https://doi.org/10.1007/s10457-015-9831-9</a>           |
| Ectopic expression of a proteinase Inhibitor I4 (MtPiI4) Gene from <i>Medicago truncatula</i> confers plant resistance to <i>Pseudomonas syringae</i> pv. Tomato DC3000          | [65]  | <a href="https://doi.org/10.1007/s11105-015-0865-y">https://doi.org/10.1007/s11105-015-0865-y</a>           |
| Down-regulation of rice serpin gene <i>OsSRP-LRS</i> exaggerates stress-induced cell death                                                                                       | [19]  | <a href="https://doi.org/10.1007/s12374-015-0283-6">https://doi.org/10.1007/s12374-015-0283-6</a>           |
| Transcript profiling of serine- and cysteine protease inhibitors in <i>Triticum aestivum</i> varieties with different drought tolerance                                          | [106] | <a href="https://doi.org/10.1556/0806.43.2015.032">https://doi.org/10.1556/0806.43.2015.032</a>             |
| Three sorghum serpin recombinant proteins inhibit midgut trypsin activity and growth of corn earworm                                                                             | [32]  | <a href="https://doi.org/10.1016/j.aggene.2016.09.005">https://doi.org/10.1016/j.aggene.2016.09.005</a>     |
| The SBT6.1 subtilase processes the GOLVEN1 peptide controlling cell elongation                                                                                                   | [107] | <a href="https://doi.org/10.1093/jxb/erw241">https://doi.org/10.1093/jxb/erw241</a>                         |
| Singlet oxygen-induced membrane disruption and serpin-protease balance in vacuolar-driven cell death                                                                             | [45]  | <a href="https://doi.org/10.1104/pp.15.02026">https://doi.org/10.1104/pp.15.02026</a>                       |
| Identification of drought stress related proteins from 1Sl(1B) chromosome substitution line of wheat variety Chinese Spring                                                      | [108] | <a href="https://doi.org/10.1186/s40529-016-0134-x">https://doi.org/10.1186/s40529-016-0134-x</a>           |
| Effects of post-anthesis fertilizer on the protein composition of the gluten polymer in a US bread wheat                                                                         | [109] | <a href="https://doi.org/10.1016/j.jcs.2015.12.002">https://doi.org/10.1016/j.jcs.2015.12.002</a>           |
| Distinct metabolic changes between wheat embryo and endosperm during grain development revealed by 2D-DIGE-based integrative proteome analysis                                   | [110] | <a href="https://doi.org/10.1002/pmic.201500371">https://doi.org/10.1002/pmic.201500371</a>                 |
| Comparative proteomic analysis of two barley cultivars ( <i>Hordeum vulgare</i> L.) with Contrasting Grain Protein Content                                                       | [111] | <a href="https://doi.org/10.3389/fpls.2016.00542">https://doi.org/10.3389/fpls.2016.00542</a>               |
| The study of plant protein accumulation in gut of insect using proteomics technique: Wheat–sun pest interaction                                                                  | [112] | <a href="https://doi.org/10.1016/j.jssas.2015.06.005">https://doi.org/10.1016/j.jssas.2015.06.005</a>       |
| The effect of <i>Fusarium culmorum</i> infection and deoxynivalenol (DON) application on proteome response in barley cultivars Chevron and Pedant                                | [113] | <a href="https://doi.org/10.1016/j.jprot.2017.07.005">https://doi.org/10.1016/j.jprot.2017.07.005</a>       |
| Serpin1 and WSCP differentially regulate the activity of the cysteine protease RD21 during plant development in <i>Arabidopsis thaliana</i>                                      | [46]  | <a href="https://doi.org/10.1073/pnas.1621496114">https://doi.org/10.1073/pnas.1621496114</a>               |
| Comparative proteomic analysis of two transgenic low-gliadin wheat lines and non-transgenic wheat control                                                                        | [114] | <a href="https://doi.org/10.1016/j.jprot.2017.06.010">https://doi.org/10.1016/j.jprot.2017.06.010</a>       |
| <i>Arabidopsis thaliana</i> serpins AtSRP4 and AtSRP5 negatively regulate stress-induced cell death and effector-triggered immunity induced by bacterial effector <i>AvrRpt2</i> | [37]  | <a href="https://doi.org/10.1111/pp1.12516">https://doi.org/10.1111/pp1.12516</a>                           |
| The tomato hybrid proline-rich protein regulates the abscission zone competence to respond to ethylene signals                                                                   | [115] | <a href="https://doi.org/10.1038/s41438-018-0033-2">https://doi.org/10.1038/s41438-018-0033-2</a>           |

|                                                                                                                                                                                    |       |                                                                                                             |
|------------------------------------------------------------------------------------------------------------------------------------------------------------------------------------|-------|-------------------------------------------------------------------------------------------------------------|
| Singlet oxygen plays an essential role in the root's response to osmotic stress                                                                                                    | [116] | <a href="https://doi.org/10.1104/pp.18.00634">https://doi.org/10.1104/pp.18.00634</a>                       |
| Proteomic analysis of the impacts of powdery mildew on wheat grain                                                                                                                 | [117] | <a href="https://doi.org/10.1016/j.foodchem.2018.04.024">https://doi.org/10.1016/j.foodchem.2018.04.024</a> |
| Noncanonical interactions between serpin and $\beta$ -amylase in barley grain improve $\beta$ -amylase activity <i>in vitro</i>                                                    | [22]  | <a href="https://doi.org/10.1002/pld3.54">https://doi.org/10.1002/pld3.54</a>                               |
| Host cell proteome of <i>Physcomitrella patens</i> harbors proteases and protease inhibitors under bioproduction conditions                                                        | [118] | <a href="https://doi.org/10.1021/acs.jproteome.8b00423">https://doi.org/10.1021/acs.jproteome.8b00423</a>   |
| Drought-induced senescence of <i>Medicago truncatula</i> nodules involves serpin and ferritin to control proteolytic activity and iron levels                                      | [20]  | <a href="https://doi.org/10.1111/nph.15298">https://doi.org/10.1111/nph.15298</a>                           |
| AtSERPIN1 is an inhibitor of the metacaspase AtMC1-mediated cell death and autocatalytic processing in planta                                                                      | [18]  | <a href="https://doi.org/10.1111/nph.14446">https://doi.org/10.1111/nph.14446</a>                           |
| Analysis of the natural dehydration mechanism during middle and latestages of wheat seeds development by some physiological traits and iTRAQ-based proteomic                       | [119] | <a href="https://doi.org/10.1016/j.jcs.2017.12.015">https://doi.org/10.1016/j.jcs.2017.12.015</a>           |
| Serpins: Genome-wide characterisation and expression analysis of the serine protease inhibitor family in <i>Triticum aestivum</i>                                                  | [120] | <a href="https://doi.org/10.1534/g3.119.400444">https://doi.org/10.1534/g3.119.400444</a>                   |
| Hordein accumulation in developing barley grains                                                                                                                                   | [121] | <a href="https://doi.org/10.3389/fpls.2019.00649">https://doi.org/10.3389/fpls.2019.00649</a>               |
| Construction of a comprehensive beer proteome map using sequential filter-aided sample preparation coupled with liquid chromatography tandem mass spectrometry                     | [39]  | <a href="https://doi.org/10.1002/jssc.201900074">https://doi.org/10.1002/jssc.201900074</a>                 |
| Comparative analyses of albumin/globulin grain proteome fraction in differentially salt-tolerant Tunisian barley landraces reveals genotype-specific and defined abundant proteins | [122] | <a href="https://doi.org/10.1111/plb.12965">https://doi.org/10.1111/plb.12965</a>                           |
| Detection and in vitro studies of <i>Cucurbita maxima</i> phloem serpin-1 RNA-binding properties                                                                                   | [23]  | <a href="https://doi.org/10.1016/j.biochi.2020.01.006">https://doi.org/10.1016/j.biochi.2020.01.006</a>     |
| Genome wide identification and comparative analysis of the serpin gene family in <i>Brachypodium</i> and Barley                                                                    | [123] | <a href="https://doi.org/10.3390/plants9111439">https://doi.org/10.3390/plants9111439</a>                   |
| Endopeptidases, exopeptidases, and glutamate decarboxylase in soybean water extract and their in vitro activity                                                                    | [124] | <a href="https://doi.org/10.1016/j.foodchem.2021.130026">https://doi.org/10.1016/j.foodchem.2021.130026</a> |
| RNA binding by plant serpins <i>in vitro</i>                                                                                                                                       | [58]  | <a href="https://doi.org/10.1134/S0006297921100059">https://doi.org/10.1134/S0006297921100059</a>           |
| Plant type I metacaspases are proteolytically active proteases despite their hydrophobic nature                                                                                    | [47]  | <a href="https://doi.org/10.1002/1873-3468.14165">https://doi.org/10.1002/1873-3468.14165</a>               |
| EMS derived wheat mutant BIG8-1 ( <i>Triticum aestivum</i> L.) — A new drought tolerant mutant wheat line                                                                          | [125] | <a href="https://doi.org/10.3390/ijms22105314">https://doi.org/10.3390/ijms22105314</a>                     |
| ApSerp-ZX from <i>Agapanthus praecox</i> , is a potential cryoprotective agent to plant cryopreservation                                                                           | [53]  | <a href="https://doi.org/10.1016/j.cryobiol.2020.11.018">https://doi.org/10.1016/j.cryobiol.2020.11.018</a> |
| Proteomics unravels new candidate genes of <i>Dasyphyrum villosum</i> for improving wheat quality                                                                                  | [28]  | <a href="https://doi.org/10.1016/j.jprot.2021.104292">https://doi.org/10.1016/j.jprot.2021.104292</a>       |
| Shotgun proteomics coupled to transient-inducible gene silencing revealrice susceptibility genes as new sources for blast disease resistance                                       | [126] | <a href="https://doi.org/10.1016/j.jprot.2021.104223">https://doi.org/10.1016/j.jprot.2021.104223</a>       |
