# Supplementary material for: Plant Serpins: Potential Inhibitors of Serine and Cysteine Proteases with Multiple Functions
Source: MDPI journal article supplement (doi:10.3390/plants12203619), 2023-10-19
Supplement: s1 [file s1]

**Table S4.** Description of studies and the serpins involved in different biotic and abiotic stresses.

| Serpins                           | Description                                                                                                                                                                                                                                                                                                                                                                              | Author* |
|-----------------------------------|------------------------------------------------------------------------------------------------------------------------------------------------------------------------------------------------------------------------------------------------------------------------------------------------------------------------------------------------------------------------------------------|---------|
| Biotic                            |                                                                                                                                                                                                                                                                                                                                                                                          |         |
| CmPS-1                            | Increased CmPS-1 in phloem sap was correlated with reduced survival of the aphid <i>Myzus persicae</i> in <i>C. maxima</i> .                                                                                                                                                                                                                                                             | [51]    |
| BSZ4 (Serpins-Z4)                 | Serpins-Z4 transcripts were upregulated in barley head tissue in response to treatment with the biocontrol bacterium <i>Pseudomonas fluorescens</i> and/or the pathogenic fungus <i>Fusarium culmorum</i> .                                                                                                                                                                              | [88]    |
| BSZ4<br>Z-Type-Serpin             | Proteomic analyses identified three serpins that were upregulated in barley grains artificially and naturally infected with <i>Fusarium</i> spp.                                                                                                                                                                                                                                         | [90]    |
| AtSerpins1                        | Bioassays and artificial diet with transgenic plants overexpressing AtSerpins1 reduced the growth of <i>Spodoptera littoralis</i> larvae and caused mortality of <i>Acyrtosiphon pisum</i> nymphs.                                                                                                                                                                                       | [29]    |
|                                   | <i>Arabidopsis thaliana</i> leaves overexpressing AtSerpins1 compromised the development of the necrotrophic fungi <i>Botrytis cinerea</i> and <i>Sclerotinia sclerotiorum</i> , and it was accelerated when serpin was absent.                                                                                                                                                          | [17]    |
|                                   | Overexpression of ASerpins1 resulted in decrease of cell death caused by the pathogen <i>Pseudomonas syringae</i> pv tomato expressing the type III effector <i>avrRpm1</i> ( <i>Pto</i> DC3000 ( <i>avrRpm1</i> )), compared to mutant and wild-type lines.                                                                                                                             | [18]    |
| JK086945<br>JK086934              | Serpins genes showed higher expression levels in the most resistant/tolerant cultivar of <i>Pyrus communis</i> after infection with the fungal pathogen <i>Stemphylium vesicarium</i> compared to the susceptible cultivar.                                                                                                                                                              | [105]   |
| MtPiI4                            | Expression of <i>MtPiI4</i> was induced by the bacterial pathogen <i>Pseudomonas syringae</i> pv. tomato DC3000 strain ( <i>Pst</i> DC3000) and treatment by methyl jasmonate (MeJA) in <i>Medicago truncatula</i> . In addition, transgenic <i>Arabidopsis thaliana</i> plants overexpressing <i>MtPiI4</i> were more resistant to <i>Pst</i> DC3000 and reduced bacterial populations. | [65]    |
| Sbser1<br>Sbser2<br>Sbser3        | Reductions between 29-53% of the average weight of <i>Helicoverpa zea</i> larvae was observed when the serpins Sbser1, Sbser2 and Sbser3 were added individually to the larval diet on sorghum leaves.                                                                                                                                                                                   | [32]    |
| Z-type serpin<br>BSZ7(Serpins Z7) | Z-type serpin and Serpins-Z7 were upregulated under the effect of an artificial infection by <i>Fusarium culmorum</i> and application of the mycotoxin Deoxynivalenol (DON) in cobs of two barley varieties.                                                                                                                                                                             | [113]   |
| WSZ1a (Serpins-Z1A)<br>Serpins 1  | Proteomic analysis revealed that spots from Serpin Z1A and serpin 1 were accumulated most in grains from wheat infected by powdery mildew.                                                                                                                                                                                                                                               | [117]   |
| TraesCS4A01G235700                | Negative regulation against the pathogens <i>Blumeria graminis</i> and <i>Puccinia striiformis</i> , and positive against <i>Zymoseptoria tritici</i> .                                                                                                                                                                                                                                  | [120]   |
| TraesCS2B01G530600                | Negative and positive regulation against fungi <i>Blumeria graminis</i> and <i>Fusarium graminearum</i> , respectively.                                                                                                                                                                                                                                                                  |         |
| TraesCS4D01G231200                | Negative regulation against <i>Puccinia striiformis</i> and <i>Blumeria graminis</i> .                                                                                                                                                                                                                                                                                                   |         |
| TraesCS2B01G033100LC              | Serpins genes were positive regulated in response to the fungal pathogen <i>Fusarium graminearum</i> .                                                                                                                                                                                                                                                                                   |         |
| TraesCS2B01G033300LC              |                                                                                                                                                                                                                                                                                                                                                                                          |         |
| TraesCS3B01G335800                |                                                                                                                                                                                                                                                                                                                                                                                          |         |
| TraesCS3D01G301100                |                                                                                                                                                                                                                                                                                                                                                                                          |         |
| TraesCS4A01G422200                |                                                                                                                                                                                                                                                                                                                                                                                          |         |
| TraesCS4A01G436000                |                                                                                                                                                                                                                                                                                                                                                                                          |         |
| TraesCS4D01G106100                |                                                                                                                                                                                                                                                                                                                                                                                          |         |
| TraesCS6B01G068900                |                                                                                                                                                                                                                                                                                                                                                                                          |         |
| TraesCS4B01G079100                | Negative regulation against <i>Fusarium pseudograminearum</i> .                                                                                                                                                                                                                                                                                                                          |         |
| TraesCS4B01G079200                | Negative regulation against <i>Puccinia striiformis</i>                                                                                                                                                                                                                                                                                                                                  |         |

|                                                                |                                                                                                                                                                                                                                                                                                                                                                                                                     |       |
|----------------------------------------------------------------|---------------------------------------------------------------------------------------------------------------------------------------------------------------------------------------------------------------------------------------------------------------------------------------------------------------------------------------------------------------------------------------------------------------------|-------|
| TraesCS4D01G090600<br>TraesCS6B01G152500<br>TraesCS6D01G114700 | Serpin genes were positive regulated in response to PAMP elicitors flg22 and chitin.                                                                                                                                                                                                                                                                                                                                |       |
| TraesCS4A01G205200<br>TraesCS5B01G492700LC                     | Serpin genes were positive and negative regulated in response to the Flg22.                                                                                                                                                                                                                                                                                                                                         |       |
| TraesCS5B01G402400<br>TraesCS6D01G048700                       | Serpin genes were positive regulated in response to chitin.                                                                                                                                                                                                                                                                                                                                                         |       |
| OsSRP-ZXA (Q75H81)                                             | Among other proteins, OsSRP-ZXA was upregulated in a comparative proteomic study between two near-isogenic rice lines with a resistant phenotype and susceptible to infection by the fungus <i>Magnaporthe oryzae</i> 12 hours after inoculation with the pathogen.                                                                                                                                                 | [126] |
| Abiotic                                                        |                                                                                                                                                                                                                                                                                                                                                                                                                     |       |
| WSZ1a (Serpin-Z1A)<br>WSZ2b (Serpin-Z2B)                       | Two-dimensional electrophoresis analyses of four wheat varieties grown in polytunnels under hot/dry or cold/humid regimes during the grain filling period identified Serpin-Z1A in three varieties, while Serpin-Z2B was absent or weakly detected regardless of variety.                                                                                                                                           | [85]  |
| <i>AtSRP2</i><br><i>AtSRP3</i>                                 | Mouse ear cress seedlings exposed to methyl methanesulfonate (MMS), a model alkylating reagent that causes DNA damage, exhibited 5- and 100-fold increased expression of the <i>AtSRP2</i> and <i>AtSRP3</i> genes, respectively.                                                                                                                                                                                   | [86]  |
| <i>Serpin-1</i><br><i>Serpin-2</i>                             | The transcriptional profile of protease inhibitors was evaluated in different winter wheat varieties with drought tolerance. Under drought, expression of the serpins in leaves of the most drought-tolerant variety tended to preserve levels close to controls, whereas in roots, <i>Serpin-1</i> exhibited variable expression in different plants, but with higher levels in the most drought-tolerant variety. | [106] |
| WSZ2b<br>(Serpin-Z2B)                                          | Serpin-Z2B protein was positively regulated under water stress in the substitution line <i>CS-1S(1B)</i> of wheat.                                                                                                                                                                                                                                                                                                  | [108] |
| AtSerpin1                                                      | Mutant <i>Arabidopsis thaliana</i> lines overexpressing AtSerpin1 showed protective effect in leaves against photodynamic damage after treatment with acridine orange (AO) photosensitizer and had attenuated cell death by AO and water stress.                                                                                                                                                                    | [45]  |
| AtSerpin1                                                      | Osmotic stress induced the accumulation of <i>Atserpin1</i> transcripts and protein complexes of AtSerpin and cognate proteases. In addition, the lines with overexpression of AtSerpin1 showed a protective effect to osmotic stress, while AtSERPIN1 knockout lines exhibited decreased root elongation rate.                                                                                                     | [116] |
| <i>MtSer6</i>                                                  | <i>MtSer6</i> gene expression increased in response to water stress (drought). In addition, knockdown of <i>MtSer6</i> and ferritins genes in response to drought caused increased papain-like cysteine protease activity and free iron levels, early nodule senescence, lower photosynthetic rate and shoot biomass.                                                                                               | [20]  |
| BSZ7 (Serpin-Z7)<br>BSZx (Serpin-Zx)                           | Serpin-Z7 and Zx were differentially expressed in two contrasting varieties with respect to salinity tolerance. Serpin-Z7 was most accumulated in the salt tolerant variety                                                                                                                                                                                                                                         | [122] |
| WSZ2a<br>WSZ2b                                                 | LC-MS/MS results revealed high abundance, in well-irrigated or stressed plants, of proteins such as Serpin-Z2A and Z2B in an ethyl methanesulfonate (EMS)-induced mutant wheat line (BIG8-1) with greater tolerance to water deficit.                                                                                                                                                                               | [125] |
| ApSerpin-ZX                                                    | At the transcriptional level Apserpin-ZX was upregulated under abiotic stress caused by saline, oxidative, cold, osmotic stress and cryopreservation in embryogenic callus of <i>A. praecox</i> . When serpin was added to the plant vitrification solution, it had a positive effect on the survival rate of cryopreserved callus.                                                                                 | [53]  |
| Biotic and Abiotic                                             |                                                                                                                                                                                                                                                                                                                                                                                                                     |       |
| <i>OsSRP-LRS</i>                                               | <i>OsSRP-LRS</i> expression was induced by inoculation of the necrotrophic fungal pathogen <i>Rhizoctonia solani</i> , UV and salt. Furthermore, transgenic RNAi lines with reduced expression of <i>OsSRP-LRS</i> showed exaggerated cell death under these conditions.                                                                                                                                            | [19]  |

|                                  |                                                                                                                                                                                                                                                                                                                                                                                                                                                                                                                            |      |
|----------------------------------|----------------------------------------------------------------------------------------------------------------------------------------------------------------------------------------------------------------------------------------------------------------------------------------------------------------------------------------------------------------------------------------------------------------------------------------------------------------------------------------------------------------------------|------|
| <i>AtSRP4</i> ;<br><i>AtSRP5</i> | The expression of <i>AtSRP4</i> and <i>AtSRP5</i> genes was induced after ultraviolet (UV) treatment and inoculation with virulent strains of <i>Pseudomonas syringae</i> pv DC3000 carrying the <i>AvrRpt2</i> ( <i>Pst-AvrRpt2</i> ) and <i>AvrB</i> ( <i>Pst-AvrB</i> ) genes. Furthermore, mutant lines of both serpin genes were more susceptible to cell death by UV and <i>Pst-AvrRpt2</i> , and the <i>AtSRP4</i> overexpression line had lower cell death. <i>AtSRP4</i> was induced in leaves by NaCl treatment. | [37] |
|----------------------------------|----------------------------------------------------------------------------------------------------------------------------------------------------------------------------------------------------------------------------------------------------------------------------------------------------------------------------------------------------------------------------------------------------------------------------------------------------------------------------------------------------------------------------|------|

\* The references cited are available in Table S2.
