# Supplementary material for: Plant Serpins: Potential Inhibitors of Serine and Cysteine Proteases with Multiple Functions
Source: MDPI journal article supplement (doi:10.3390/plants12203619), 2023-10-19
Supplement: s1 [file s1]

**Table S5.** Description of the PICO strategy.

| Acronym | Definition               | Components of the question                                                                                                                          |
|---------|--------------------------|-----------------------------------------------------------------------------------------------------------------------------------------------------|
| P       | Population               | Plant serpins.                                                                                                                                      |
| I       | Intervention or Interest | Systematize the scientific production of the functionality of serpins in plant systems and the different biotic and abiotic stresses.               |
| C       | Comparison               | The involvement of plant serpins under biotic and abiotic stresses and their inhibitory potential tested against serine and cysteine proteases.     |
| O       | Outcome                  | Location, functional characterization, inhibitory potential, expression level and biological processes of plant serpins under different conditions. |
