# Supplementary material for: Plant Serpins: Potential Inhibitors of Serine and Cysteine Proteases with Multiple Functions
Source: Plants (Basel). 2023 Oct 19;12(20):3619. doi: 10.3390/plants12203619 (PMC10609998; doi:10.3390/plants12203619)
Supplement: Supplementary file 1 [file plants-12-03619-s001.zip › Spreadsheets S1.xlsx]

## Sheet: Betweeness and degree values
Eudicot proteins	Betweennes values		Eudicot proteins	Degree values		Monocot proteins	Betweeness values		Monocot proteins	Degree values
CYCB1;4	0		AT1G42470	1		Traes_1DL_FAB396374,2	0		Traes_1DL_FAB396374.2	1
CYCB2;4	0		ABCC1	1		Traes_1DL_E3D1E91FD,1	0		Traes_1DL_E3D1E91FD.1	1
SDS	0		AT1G19110	1		Traes_1DL_9DE76F004,1	0		Traes_1DL_9DE76F004.1	1
BSU1	0		MC9	1		Traes_1DL_944C8D478,1	0		Traes_1DL_944C8D478.1	1
AT1G42470	0		RGF6	1		Traes_1DL_5CA3F2E9A,2	0		Traes_1DL_5CA3F2E9A.2	1
AT1G18480	0		MC4	1		Traes_1BL_EEDA1E41F,1	0		Traes_1BL_EEDA1E41F.1	1
AT1G13460	0		CEP1	1		Traes_1BL_D21E2A0BE,1	0		Traes_1BL_D21E2A0BE.1	1
ABCC1	0		ABCC4	1		Traes_1BL_BDF2FCEC7,2	0		Traes_1BL_BDF2FCEC7.2	1
AT3G54930	0		ABCC7	1		Traes_1BL_7811216CE,2	0		Traes_1BL_7811216CE.2	1
AT1G19110	0		TOPP9	1		Traes_1AS_462C8AC79,2	0		Traes_1AS_462C8AC79.2	1
CYCB1;3	0		ABCC8	1		Traes_1AS_3EE90BAF7,1	0		Traes_1AS_3EE90BAF7.1	1
CYCB3;1	0		DAR2	1		Traes_1AS_29390877C,1	0		Traes_1AS_29390877C.1	1
AT3G09960	0		ABCC3	1		Traes_1AL_ABEA95ABE,5	0		Traes_1AL_ABEA95ABE.5	1
MC9	0		ABCC2	1		Traes_1AL_45AB9EF34,1	0		Traes_1AL_45AB9EF34.1	1
RGF6	0		ABCC6	1		Traes_1AL_399C1DBF5,1	0		Traes_1AL_399C1DBF5.1	1
MC4	0		BSL3	1		Traes_1AL_0C24CBB55,1	0.557143		Traes_1AL_0C24CBB55.1	6
CEP1	0		CYCB2;1	1		Traes_2AL_A178D0936,1	0.557143		Traes_2AL_A178D0936.1	6
CBSX4	0		ABCC13	1		Traes_2AL_6061FA883,1	0.557143		Traes_2AL_6061FA883.1	6
KING1	0		NAP5	1		Traes_2BL_20929BE3E,1	0.557143		Traes_2BL_20929BE3E.1	6
CBSX6	0		AT1G30515	1		Traes_2BL_2C4D11A01,1	0.557143		Traes_2BL_2C4D11A01.1	6
B'DELTA	0		RFNR2	1		Traes_2DL_C8939F784,1	0.557143		Traes_2DL_C8939F784.1	6
AT3G21650	0		ABCC11	1		Traes_2BL_D0EB33D21,1	0.557143		Traes_2BL_D0EB33D21.1	6
AT3G26020	0		ABCC12	1		Traes_2DL_06741A74F,1	0.557143		Traes_2DL_06741A74F.1	6
ABCC4	0		CYCB2;3	1		Traes_2DL_C8939F7841,1	0.557143		Traes_2DL_C8939F7841.1	6
ABCC7	0		AT1G20590	1		Traes_2BL_7D700A166,1	0.557143		Traes_2BL_7D700A166.1	6
TOPP9	0		FNR2	1		Traes_4BL_EBB5D0D50,2	0.557143		Traes_4BL_EBB5D0D50.2	6
ABCC8	0		DA1	1		Traes_6DL_B506A186D,2	0.557143		Traes_6DL_B506A186D.2	6
DAR2	0		BSL2	1		Traes_6AL_6B01DD1BD,1	0.557143		Traes_6AL_6B01DD1BD.1	6
ABCC3	0		ABCC5	1		Traes_4DL_4DA1BA866,3	0.557143		Traes_4DL_4DA1BA866.3	6
ABCC2	0		AT3G01730	1		Traes_5BL_35CA32B69,3	0.557143		Traes_5BL_35CA32B69.3	6
ABCC6	0		CYCB1;5	2		Traes_5AL_69A2CBFC4,2	0.557143		Traes_5AL_69A2CBFC4.2	6
BSL3	0		SDS	2		Traes_2AS_697562C77,2	0.557143		Traes_6AS_328A3231F.2	6
CYCB2;1	0		BSU1	2		Traes_2DS_470059BC4,2	0.557143		Traes_6BS_DAB9EEDF4.2	6
ABCC13	0		S1P	2		Traes_2BS_B81B9AF3B,2	0.557143		Traes_1DL_F9213AB33.1	6
NAP5	0		AT1G18480	2		Traes_6AS_328A3231F,2	0.557143		Traes_1BL_F8BB21BC2.1	6
AT1G30515	0		AT2G26390	2		Traes_6BS_DAB9EEDF4,2	0.557143		Traes_1BL_611DF0433.1	6
RFNR2	0		SRP2	2		Traes_1DL_F9213AB33,1	0.557143		Traes_2AS_697562C77.2	7
ABCC11	0		RD21A	2		Traes_1BL_F8BB21BC2,1	0.557143		Traes_2DS_470059BC4.2	7
ABCC12	0		CYCB3;1	2		Traes_1BL_611DF0433,1	0.557143		Traes_2BS_B81B9AF3B.2	7
CYCB2;3	0		AT3G09960	2		Traes_1DL_8965ABD03,1	1.17911		Traes_1AL_9BF6FCCBD.1	9
AT1G20590	0		CBSX4	2		Traes_1DL_259854693,1	1.17911		Traes_1DS_309F807A1.2	17
FNR2	0		KING1	2		Traes_1BL_9F08B6CF1,1	1.17911		Traes_1BS_BF71914E7.2	17
DA1	0		CBSX6	2		Traes_1BL_4B77DB315,2	1.17911		Traes_1AS_898DFB661.1	17
BSL2	0		YCB1;4	3		Traes_1AL_AF222553D,1	1.17911		Traes_1AS_4025A300E.1	17
ABCC5	0		CYCB2;4	3		Traes_1AL_82FBE325B,1	1.17911		Traes_1DL_8965ABD03.1	18
AT3G01730	0		SLP1	3		Traes_1DL_46A1299E2,1	1.3131		Traes_1DL_259854693.1	18
AT1G15330	0.333333		AT3G09970	3		Traes_1DL_1DBC226D5,1	1.3131		Traes_1BL_9F08B6CF1.1	18
AT1G69800	0.333333		CCP3	3		Traes_1BL_FC77D0C05,1	1.3131		Traes_1BL_4B77DB315.2	18
SLP1	0.5		SRP3	3		Traes_1BL_82133E670,1	1.3131		Traes_1AL_AF222553D.1	18
AT3G09970	0.5		CYCB1;3	3		Traes_1AL_BCF6D4905,2	1.3131		Traes_1AL_82FBE325B.1	18
B'BETA	2		AT1G15330	4		Traes_1AL_9BF6FCCBD,1	1.49412		Traes_1DL_46A1299E2.1	19
TOPP4	3		AT1G69800	4		Traes_1DS_309F807A1,2	2.83574		Traes_1DL_1DBC226D5.1	19
TOPP5	3		AT1G71850	5		Traes_1BS_BF71914E7,2	2.83574		Traes_1BL_FC77D0C05.1	19
TOPP3	3		AT1G13460	5		Traes_1AS_898DFB661,1	2.83574		Traes_1BL_82133E670.1	19
RD21A	3.66667		AT3G54930	5		Traes_1AS_4025A300E,1	2.83574		Traes_1AL_BCF6D4905.2	19
SNF4	4.5		B'DELTA	5		Traes_1DL_D9D4C863A,1	5.82748		Traes_1DS_C327E495D.1	25
AT2G26390	10.1667		AT3G21650	5		Traes_1BS_5F2749367,1	5.82748		Traes_1DL_D9D4C863A.1	27
SRP2	10.1667		AT3G26020	5		Traes_1AS_D089D05E5,1	5.82748		Traes_1BS_5F2749367.1	27
TOPP1	12		SNF4	6		Traes_1AL_A5D20159F,1	5.82748		Traes_1AS_D089D05E5.1	27
CYCB1;5	27		B'BETA	6		CDC25,1-1DL	6.85153		Traes_1AL_A5D20159F.1	27
AT1G71850	29.5		SERPIN1	8		Traes_1BL_5B14A32F3,1	6.85153		Traes_7DS_255D13EDA.1	28
S1P	64		TOPP4	10		Traes_1DS_F6BDFABDF,1	10.9505		Traes_4DS_7B10CE75F.1	28
SRP3	74.1667		TOPP5	10		Traes_1BS_9DF369DD41,1	10.9505		Traes_5DL_8115D3D0D.1	28
CCP3	74.1667		TOPP3	10		Traes_1BS_9DF369DD4,1	10.9505		Traes_5BL_22ED571AE.1	28
SERPIN1	408.333		TOPP1	12		Traes_1AS_B064460F3,1	10.9505		Traes_5DL_D4B0422E9.1	28
AT2G20050	1926.67		AT2G20050	55		Traes_1DL_D3209EB84,2	11.3578		Traes_1BS_14D12FE1B.1	29
						Traes_1BS_14D12FE1B,1	11.3578		Traes_1AS_C516284BE.2	29
						Traes_1BL_A192B4948,2	11.3578		Traes_1AS_6ED5D90CF.1	29
						Traes_1AS_C516284BE,2	11.3578		Traes_1AL_D6D6DDE5E.1	29
						Traes_1AS_6ED5D90CF,1	11.3578		Traes_1DS_F6BDFABDF.1	30
						Traes_1AL_D6D6DDE5E,1	11.3578		Traes_1DL_D3209EB84.2	30
						Traes_1AL_1F1744680,1	11.3578		Traes_1BS_9DF369DD41.1	30
						Traes_1AL_17C37FFB0,2	11.4578		Traes_1BS_9DF369DD4.1	30
						Traes_1DS_C327E495D,1	150.929		Traes_1BL_A192B4948.2	30
						14R2	182.631		Traes_1AS_B064460F3.1	30
						Traes_4BS_F7F9DE1D4,2	182.631		Traes_1AL_1F1744680.1	30
						Traes_4AL_6B5C89E7C,1	182.631		CDC25.1-1DL	31
						Traes_7DS_255D13EDA,1	249.117		Traes_1BL_5B14A32F3.1	31
						Traes_4DS_7B10CE75F,1	249.117		Traes_1AL_17C37FFB0.2	32
						Traes_5DL_8115D3D0D,1	249.117		14R2	34
						Traes_5BL_22ED571AE,1	249.117		Traes_4BS_F7F9DE1D4.2	34
						Traes_5DL_D4B0422E9,1	249.117		Traes_4AL_6B5C89E7C.1	34
						Traes_6BL_DFDCD5B11,1	1626.97		Traes_6BL_DFDCD5B11.1	61
